# Supplementary material for: A Sialic Acid Binding Site in a Human Picornavirus
Source: PLOS journal article supplement (doi:10.1371/journal.ppat.1004401), 2014-10-16
Supplement: S11 (10.1371/journal.ppat.1004401.s011) [file journal.ppat.1004401.s011]

**Table S2. Structurally related capsid proteins of VP4<sup>a</sup>**

| <b>Virus</b>            | <b>PDB entry</b> | <b>Capsid protein</b> | <b>Z-Score</b> | <b>Sequence identity [%]</b> | <b>C<math>\alpha</math>-rmsd [Å]</b> | <b># of aligned residues</b> |
|-------------------------|------------------|-----------------------|----------------|------------------------------|--------------------------------------|------------------------------|
| Rhinovirus B3, (3.0 Å)  | 1rhi             | VP4                   | 4.0            | 70                           | 0.7                                  | 43 / 43                      |
| Rhinovirus B14, (2.5 Å) | 1ncq             | VP4                   | 3.6            | 68                           | 0.7                                  | 40 / 40                      |
| Enterovirus 71 (2.6 Å)  | 3vbf             | VP4                   | 2.4            | 51                           | 1.1                                  | 39 / 58                      |

<sup>a</sup> Structure similarity search was performed using DALI[1]. Redundant entries were removed.
